# Supplementary material
Source: PubMed Central journal article supplement (PMC4285579)
Supplement: NIHMS61430-supplement-1.pdf [file NIHMS61430-supplement-1.pdf]

## SUPPLEMENTAL MATERIAL

**Supplemental Table I:** Definitions for histological plaque features in Oxford Plaque Study and Athero-Express

| Characteristic                                         | Staining Oxford | Staining AE | Definition used in Oxford Plaque Study                                                                                                                      | Definition used in Athero-Express                                                                                                                         | Overall Agreement | Similarities                                 | Differences                                                                              |  |
|--------------------------------------------------------|-----------------|-------------|-------------------------------------------------------------------------------------------------------------------------------------------------------------|-----------------------------------------------------------------------------------------------------------------------------------------------------------|-------------------|----------------------------------------------|------------------------------------------------------------------------------------------|--|
| <b>Overall plaque stability</b>                        | H&E             | H&E         | 0 Stable predominantly fibrous plaque with thick, intact cap OR predominantly stable, some features of instability, eg, inflammation, but thick, intact cap | 0 Stable/fibrous: small (<10% of plaque area) or absent lipid core, low macrophage infiltration, and high smooth muscle cell and collagen content         | Good              | Assessment includes                          | - Cap rupture (no data in AE)<br>- Lipid core<br>- Fibrous composition<br>- Inflammation |  |
|                                                        | EVG             | EVG         | 1 Unstable with intact thin cap, large lipid core, but no definite rupture or surface thrombus OR unstable with ruptured cap or thrombus present            | 1 Unstable/atheromatous: large lipid core (>40% of plaque surface area) and high macrophage infiltration with low smooth muscle cell and collagen content |                   |                                              |                                                                                          |  |
|                                                        | CD68            | CD68        |                                                                                                                                                             |                                                                                                                                                           |                   |                                              |                                                                                          |  |
|                                                        |                 | PSR         |                                                                                                                                                             |                                                                                                                                                           |                   |                                              |                                                                                          |  |
| <b>Fibrous</b>                                         | H&E             | H&E         | 0 Very little fibrous tissue or ≈ 50% fibrous tissue                                                                                                        | 0 Atheromatous/fibroatheromatous                                                                                                                          | Good              | Both based on 3-grade scale                  |                                                                                          |  |
|                                                        | EVG             | EVG         | 1 Predominantly fibrous plaque                                                                                                                              | 1 Predominantly fibrous plaque, absent lipid core, or <10% of plaque surface area                                                                         |                   |                                              |                                                                                          |  |
| <b>Lipid core</b>                                      | H&E             | H&E         | 0 None or small                                                                                                                                             | 0 no or smaller than 40% of total plaque surface area                                                                                                     | Moderate / Good   | Both based on 3-grade scale                  | Different cut off: Oxford >25%<br>AE >40%                                                |  |
|                                                        |                 | PSR         | 1 A large lipid core was considered to occupy ≥ 50% of the thickness of the plaque or ≥ 25% of the total section area.                                      | 1 >40% of plaque surface area covered by lipid core                                                                                                       |                   |                                              |                                                                                          |  |
| <b>Inflammatory plaque (severity of CD68 staining)</b> | CD68            | CD68        | 0 No staining OR +: occasional scattered cells or 1 group of >50 cells                                                                                      | 0 Absent or minor CD68 staining with negative or clusters with <10 cells present                                                                          | Good              | Both based on 4-grade scale                  | Different cut off for number of positive cells and clusters                              |  |
|                                                        | CD 3            |             | 1 ++:Several groups (>5) of >50 cells or +++: Many groups (>5) of >50 cells or 1 group of >500 cells                                                        | 1 moderate or heavy staining, cell clusters with >10 cells present or abundance of positive cells                                                         |                   |                                              |                                                                                          |  |
| <b>Presence of thrombus</b>                            | H&E             | H&E         | 0 No luminal thrombus                                                                                                                                       | 0 No luminal thrombus                                                                                                                                     | Good              | - Comparable definitions<br>- Both binominal | None                                                                                     |  |
|                                                        |                 | Fibrin      | 1 Thrombus was recorded when there was an organized collection of fibrin and red blood cells in the lumen.                                                  | 1 Thrombus formation at the luminal side of the plaque with positive staining for fibrin                                                                  |                   |                                              |                                                                                          |  |

| Characteristic                            | Staining Oxford | Staining AE     | Definition used in Oxford Plaque Study                                                                                                      | Definition used in Athero-Express                                                                                                                                                                                                                          | Overall Agreement | Similarities                       | Differences                      |
|-------------------------------------------|-----------------|-----------------|---------------------------------------------------------------------------------------------------------------------------------------------|------------------------------------------------------------------------------------------------------------------------------------------------------------------------------------------------------------------------------------------------------------|-------------------|------------------------------------|----------------------------------|
| <b>Presence of intraplaque hemorrhage</b> | H&E             | H&E<br>Fibrin   | 0 None<br>1 Includes recent or old hemorrhage; is an area of erythrocytes causing disruption of plaque architecture (def: Bassiouny et al.) | 0 Absent<br>1 Hemorrhage within the tissue of the plaque, including fresh and organized haemorrhage                                                                                                                                                        | Good              | Loose erythrocytes scored negative | Additional fibrin staining in AE |
| <b>Calcifications</b>                     | H&E             | H&E             | 0 None or small amounts when there was stippling only<br>1 considered to be present in large amounts when nodular deposits                  | 0 no or minor staining along part of the luminal border of the plaque or a few scattered spots within the lesion<br>1 moderate or heavy staining along the entire luminal border or evident parts within the lesion                                        | Good              | Both based on 4-grade scale        |                                  |
| <b>Collagen</b>                           |                 | EVG             | No data                                                                                                                                     | 0 no or minor staining along part of the luminal border of the plaque<br>1 moderate or heavy staining along the entire luminal border                                                                                                                      | None              |                                    |                                  |
| <b>Cap rupture</b>                        | EVG             |                 | 0 Intact Cap<br>1 Clear communication between the lipid core and the lumen with a break in the fibrous cap                                  | No data                                                                                                                                                                                                                                                    | None              |                                    |                                  |
| <b>Smooth muscle cells</b>                |                 | $\alpha$ -actin | No data                                                                                                                                     | 0 no or minor $\alpha$ -actin staining over the entire circumference with absent staining at parts of the circumference of the arterial wall<br>1 positive cells along the circumference of the luminal border, with locally at least few scattering cells | None              |                                    |                                  |

**Supplemental Table II:** Odds-ratios for the presence of individual plaque characteristics in the highest versus lowest quartile of 1-year stroke risk for subgroups of patients with and without prior statin use.

| Plaque characteristic      | No Prior Statin Use (n=678) |      |           |         | Prior Statin Use (n=913) |      |           |         | P-Value for Interaction |
|----------------------------|-----------------------------|------|-----------|---------|--------------------------|------|-----------|---------|-------------------------|
|                            | Total N (%)                 | OR   | 95% CI    | P-value | Total N (%)              | OR   | 95% CI    | P-value |                         |
| Overall plaque instability | 452 (67.6)                  | 1.28 | 0.83-1.98 | 0.27    | 613 (67.2)               | 1.43 | 0.97-2.11 | 0.07    | 0.71                    |
| Thrombus                   | 259 (38.4)                  | 1.24 | 0.80-1.91 | 0.34    | 374 (41.0)               | 1.57 | 1.06-2.33 | 0.03    | 0.58                    |
| Heavy macrophage staining  | 401 (60.0)                  | 1.57 | 1.02-2.40 | 0.04    | 554 (60.9)               | 1.11 | 0.76-1.64 | 0.59    | 0.31                    |
| High micro-vessel density  | 179 (31.5)                  | 1.53 | 0.94-2.46 | 0.09    | 190 (33.5)               | 1.30 | 0.77-2.18 | 0.32    | 0.16                    |
| Large lipid core           | 467 (68.9)                  | 1.28 | 0.82-2.00 | 0.29    | 676 (74.6)               | 1.23 | 0.81-1.87 | 0.33    | 0.82                    |
| Plaque haemorrhage         | 187 (27.6)                  | 1.25 | 0.80-1.97 | 0.33    | 206 (22.6)               | 1.14 | 0.72-1.82 | 0.58    | 0.87                    |
| Fibrous plaque             | 206 (30.4)                  | 0.62 | 0.39-0.97 | 0.04    | 301 (33.0)               | 0.71 | 0.48-1.05 | 0.09    | 0.65                    |
| Heavy calcification        | 360 (53.1)                  | 0.91 | 0.60-1.38 | 0.66    | 459 (50.4)               | 0.86 | 0.59-1.26 | 0.44    | 0.85                    |

Abbreviations: N, number of cases; OR, odds ratio; CI, confidence interval. Statin use was unknown in 49 patients. All data stratified by study cohort.
